# Supplementary material for: Investigating the role of human serum albumin protein pocket on the excited state dynamics of indocyanine green using shaped femtosecond laser pulses
Source: Royal Society of Chemistry journal article supplement (doi:10.1039/c4cp04984e), 2015-01-01
Supplement: c4cp04984e1.pdf [file c4cp04984e1.pdf]

## Electronic Supplementary Information

### **Investigating the Role of Human Serum Albumin Protein Pocket on the Excited State Dynamics of Indocyanine Green Using Shaped Femtosecond Laser Pulses**

*Muath Nairat,<sup>a</sup> Arkaprabha Konar,<sup>a</sup> Marie Kaniecki,<sup>a</sup> Vadim V. Lozovoy<sup>a</sup> and Marcos  
Dantus<sup>\*ab</sup>*

a Department of Chemistry, Michigan State University, East Lansing, Michigan 48824,  
USA

b Department of Physics and Astronomy, Michigan State University, East Lansing,  
Michigan 48824, USA

\* Corresponding author: [dantus@msu.edu](mailto:dantus@msu.edu)

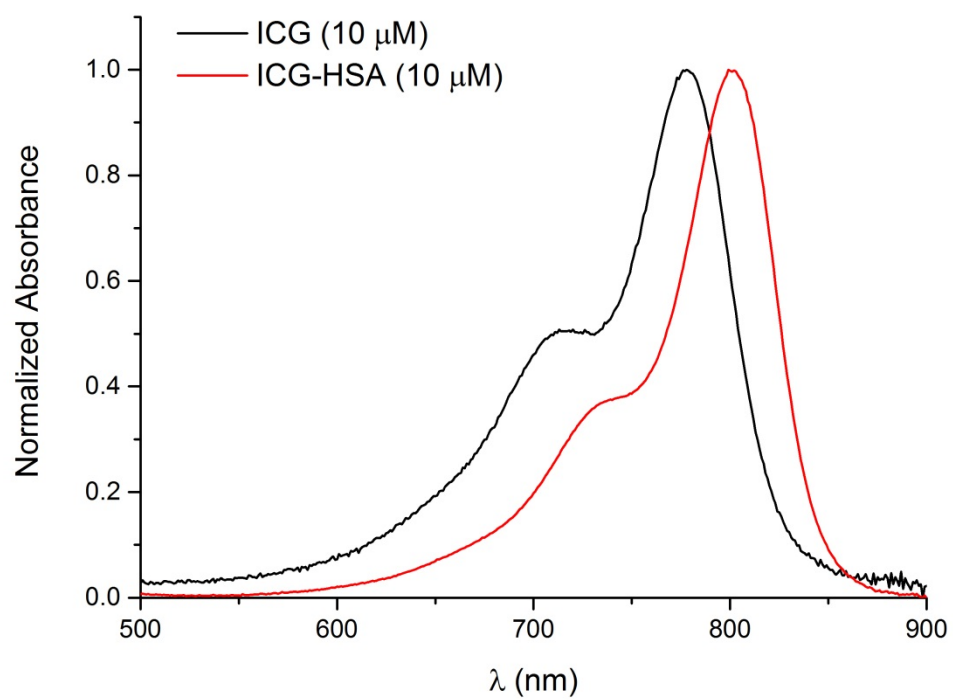

**Fig. S1** Normalized ICG (black) and ICG-HSA (red) absorbance spectra showing ICG red shift after binding inside HSA site IIA pocket.

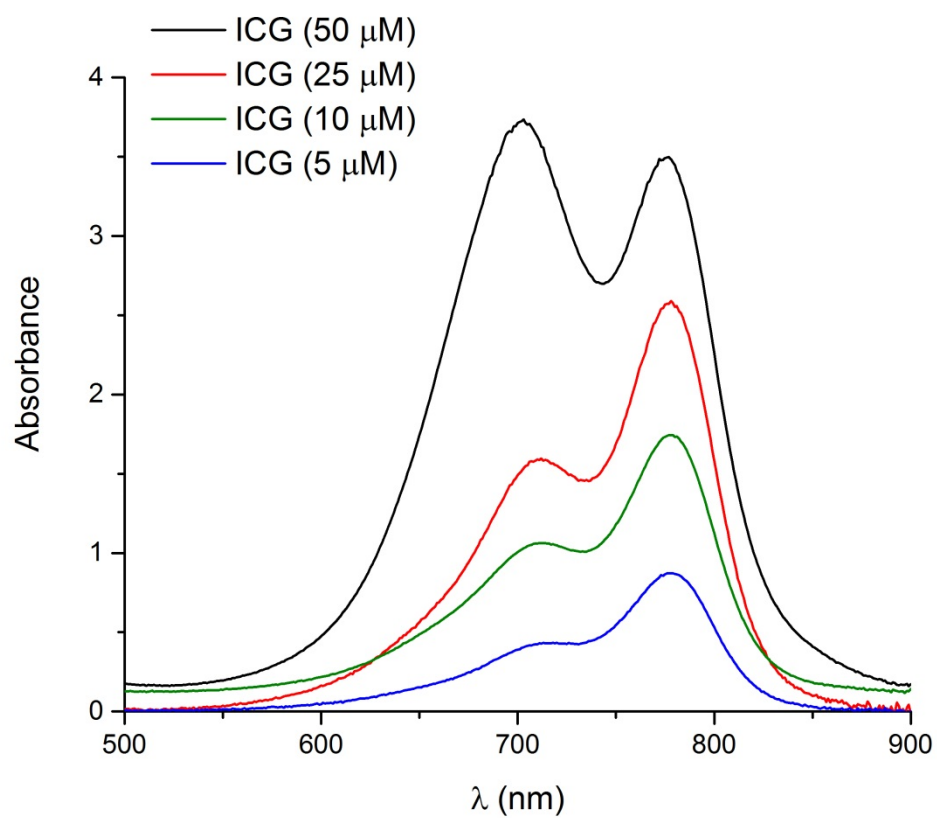

**Fig. S2** Absorbance spectra for different ICG concentrations showing an increase in the J-aggregates absorbance band with concentrations higher than 10  $\mu\text{M}$ .

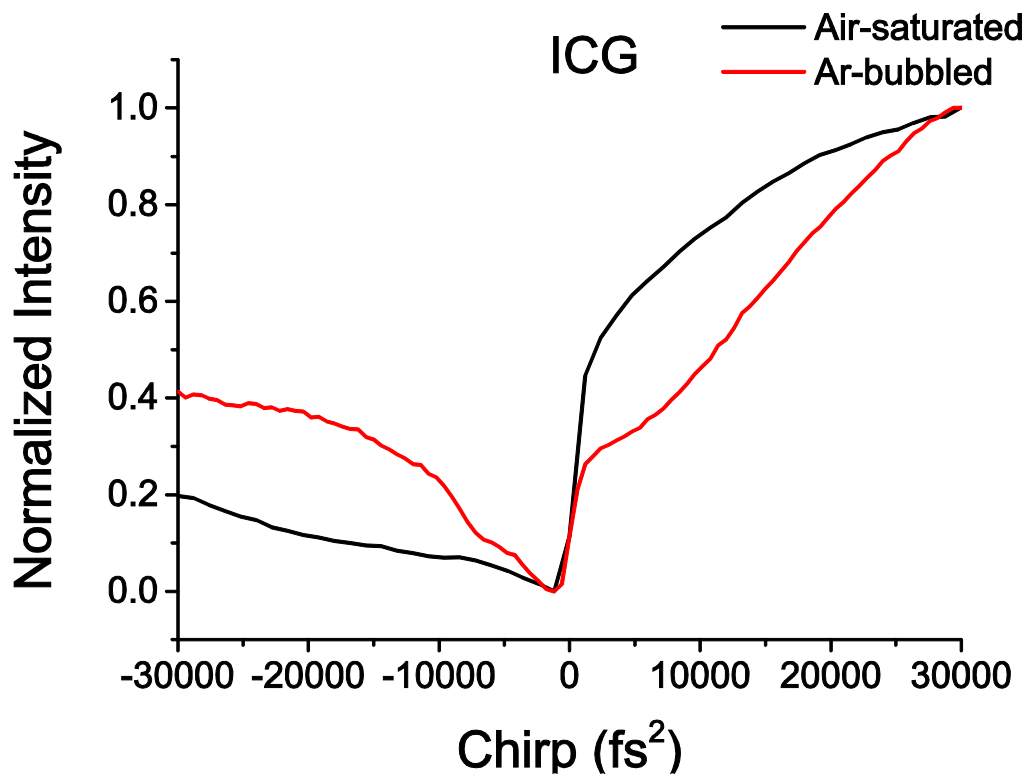

**Fig. S3** Normalized integrated fluorescence intensity as a function of chirp for ICG solution in the presence and absence of O<sub>2</sub> at 1 kHz repetition rate.

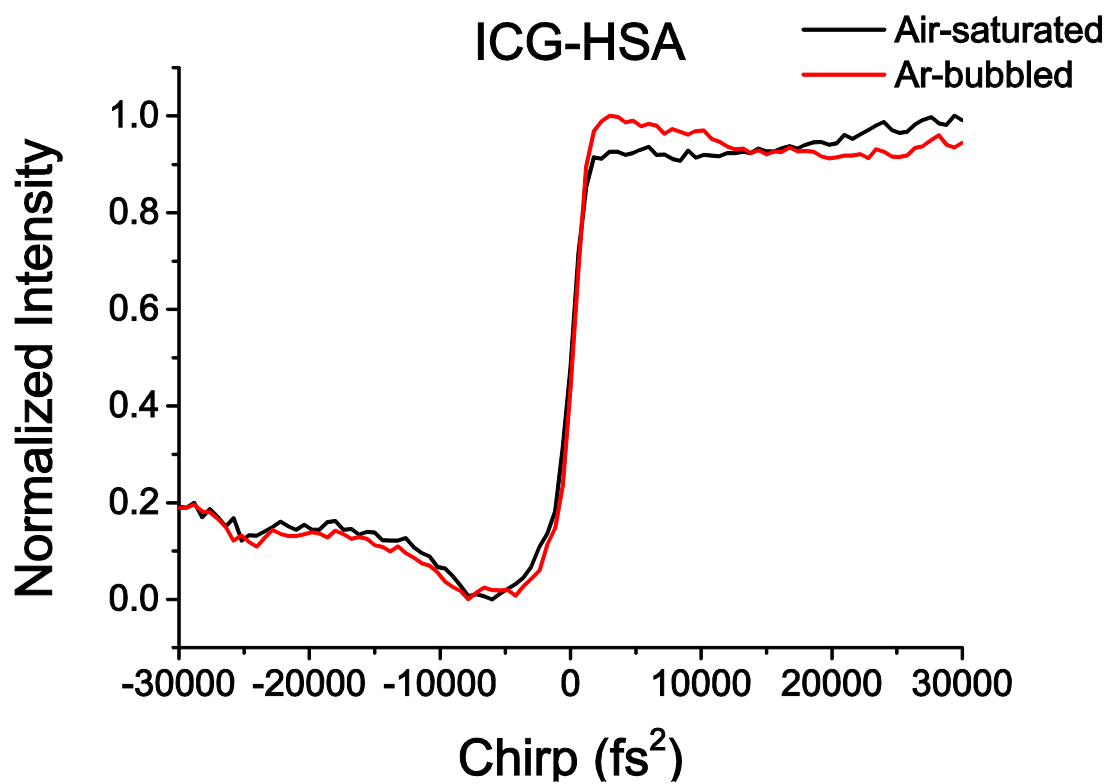

**Fig. S4** Normalized integrated fluorescence intensity as a function of chirp for ICG-HSA solution in the presence and absence of O<sub>2</sub> at 1 kHz repetition rate.

The used fitting function for the oscillations in Fig. 6 is in the form

$$A + a \cos(2\pi\omega t + \phi) + bt$$

And the obtained parameters for the fit are in Table S1 ( $\omega$  are in the units of PHz):

**Table S1**

| <b>Parameter</b> | <b>Negative delay time fit</b> | <b>Positive delay time fit</b> |
|------------------|--------------------------------|--------------------------------|
| A                | 140896                         | 150347                         |
| <i>a</i>         | 472.751                        | 111.005                        |
| <i>b</i>         | -1.5558                        | 0.2727                         |
| $\omega$         | 0.0035                         | 0.0057                         |
| $\phi$           | 2.1884                         | 1.1564                         |
